# Supplementary material for: Activation of Granulocytes in Response to a High Protein Diet Leads to the Formation of Necrotic Lesions in the Liver
Source: MDPI journal article supplement (doi:10.3390/metabo13020153), 2023-01-19
Supplement: s1 [file s1]

*Article*

# **Activation of granulocytes in response to a high protein diet leads to the formation of necrotic lesions in the liver**

Ante Benić<sup>1</sup>, Sanja Mikašinović, Felix M Wensveen<sup>1</sup>, Bojan Polić<sup>1,\*</sup>

## **Supplemental Material.**

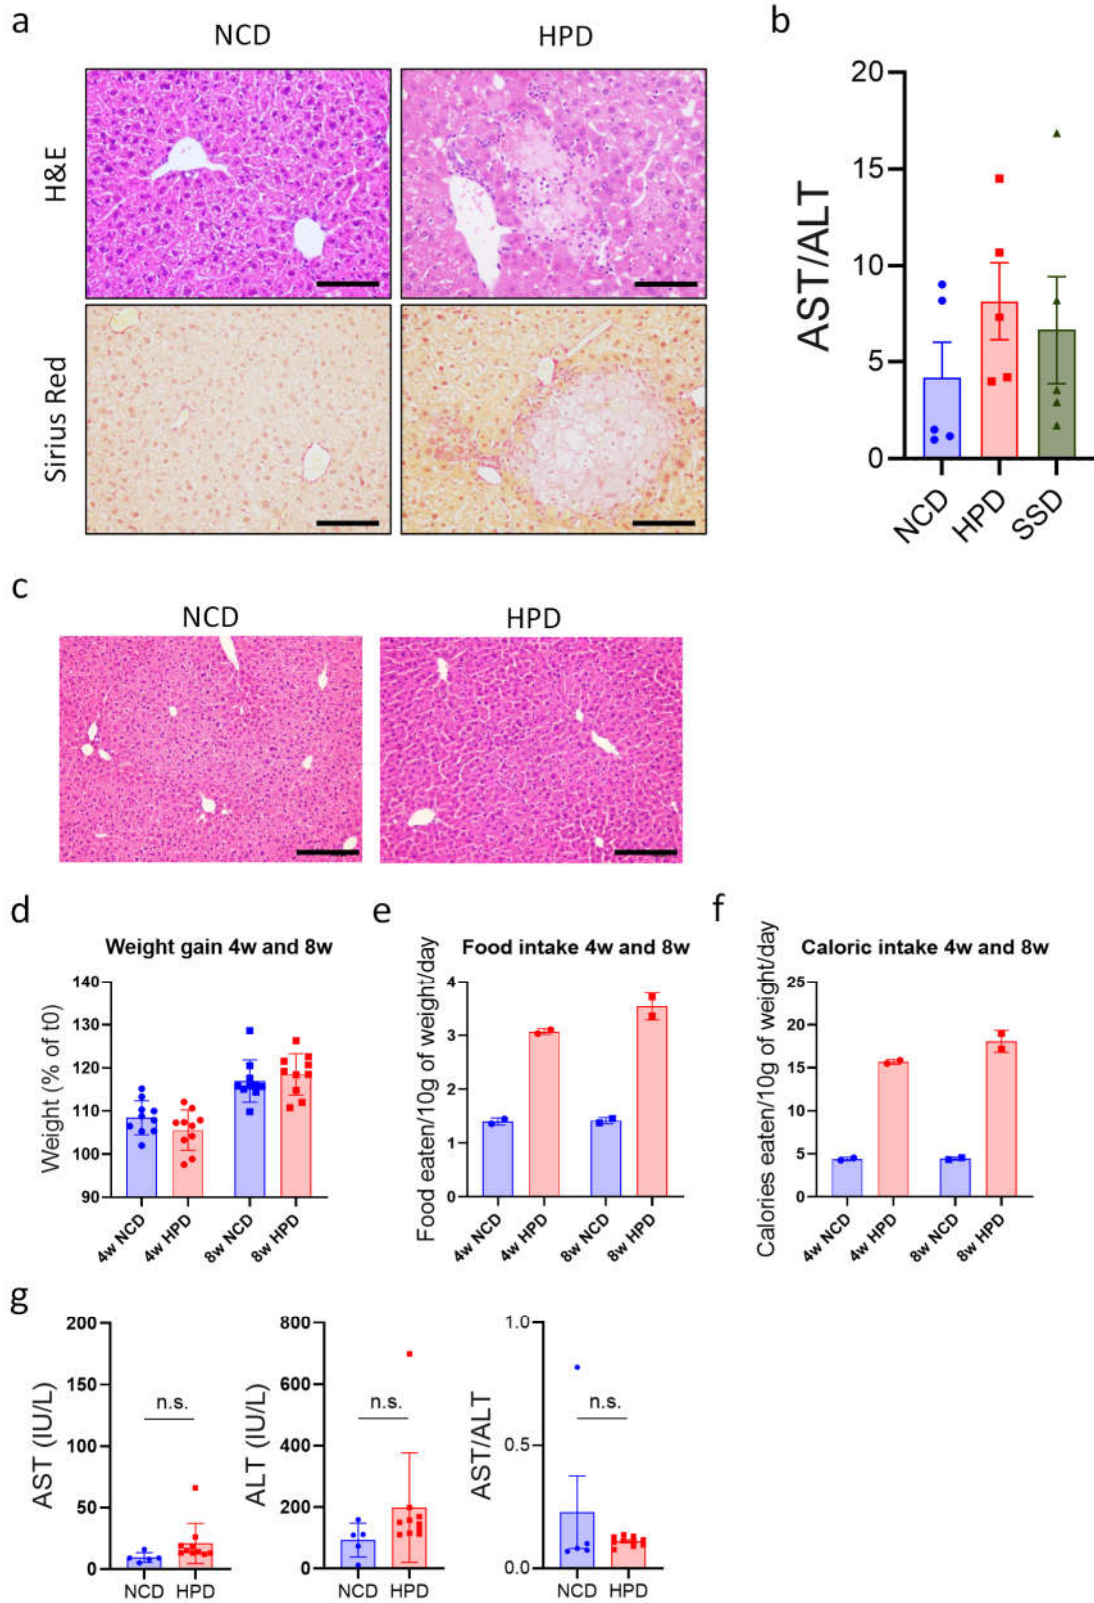

**Supplemental figure S1. Short term high protein diet (HPD) causes changes in liver histology.** (a) Enlargement of livers stained with H&E or Sirius Red after 2 weeks of NCD or HPD. Scale bars indicate 200  $\mu$ m. (b) AST/ALT in the serum of animals fed for 2 weeks with an NCD, HPD or SSD. (b) AST/ALT ratio in serum of animals fed for 2 weeks with indicated diets. (d) Weight gain compared to starting weight in animals fed NCD or HPD for 4 and 8 weeks. (e) Food intake and (f) Atwater caloric intake at 4 weeks or 8 weeks of NCD and HPD. (f) Representative slide of livers stained with H&E after 8 weeks of NCD or HPD. Scale bars indicate 400  $\mu$ m. (g) AST and ALT in serum of animals fed for 8 weeks with an NCD or HPD. Data show means  $\pm$ s.e.m. For all panels, shown is one of at least two experiments with similar results.

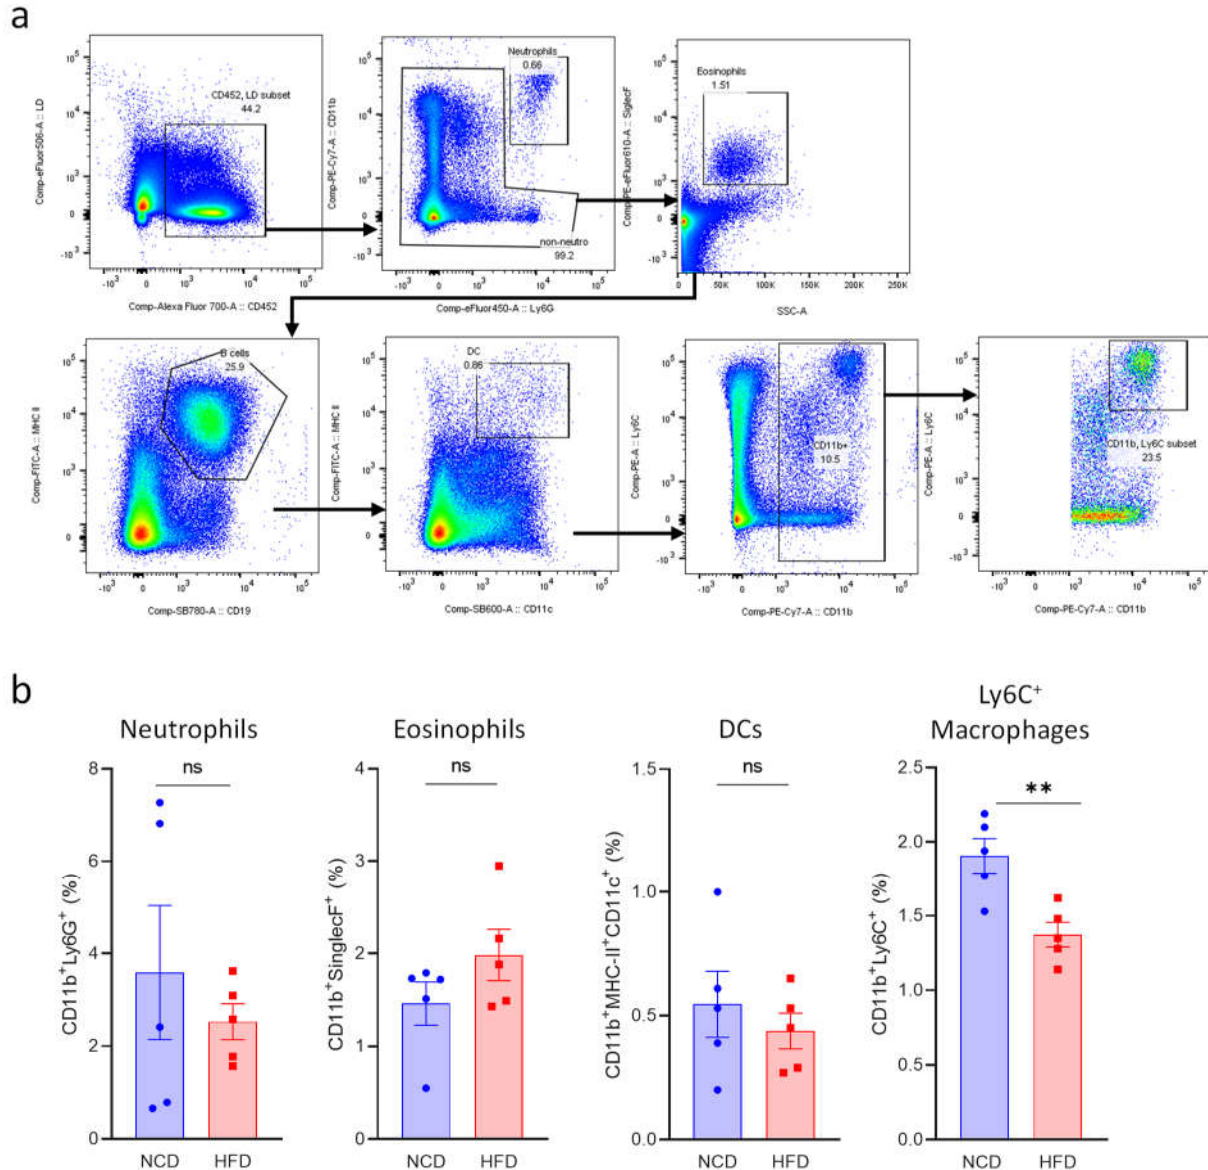

**Supplemental figure s2. (a) Gating strategy for analysis of myeloid cell populations in the liver. (b) Relative frequency of indicated immune cell subpopulations in the spleen of NCD or HFD-fed animals after 2 weeks of diet. Data show means  $\pm$ s.e.m. For all panels, shown is one of at least two experiments with similar results. Indicated are statistical significances at Student's t-test; \*  $p < 0.05$ , \*\*  $p < 0.01$ , \*\*\*  $p < 0.001$ .**

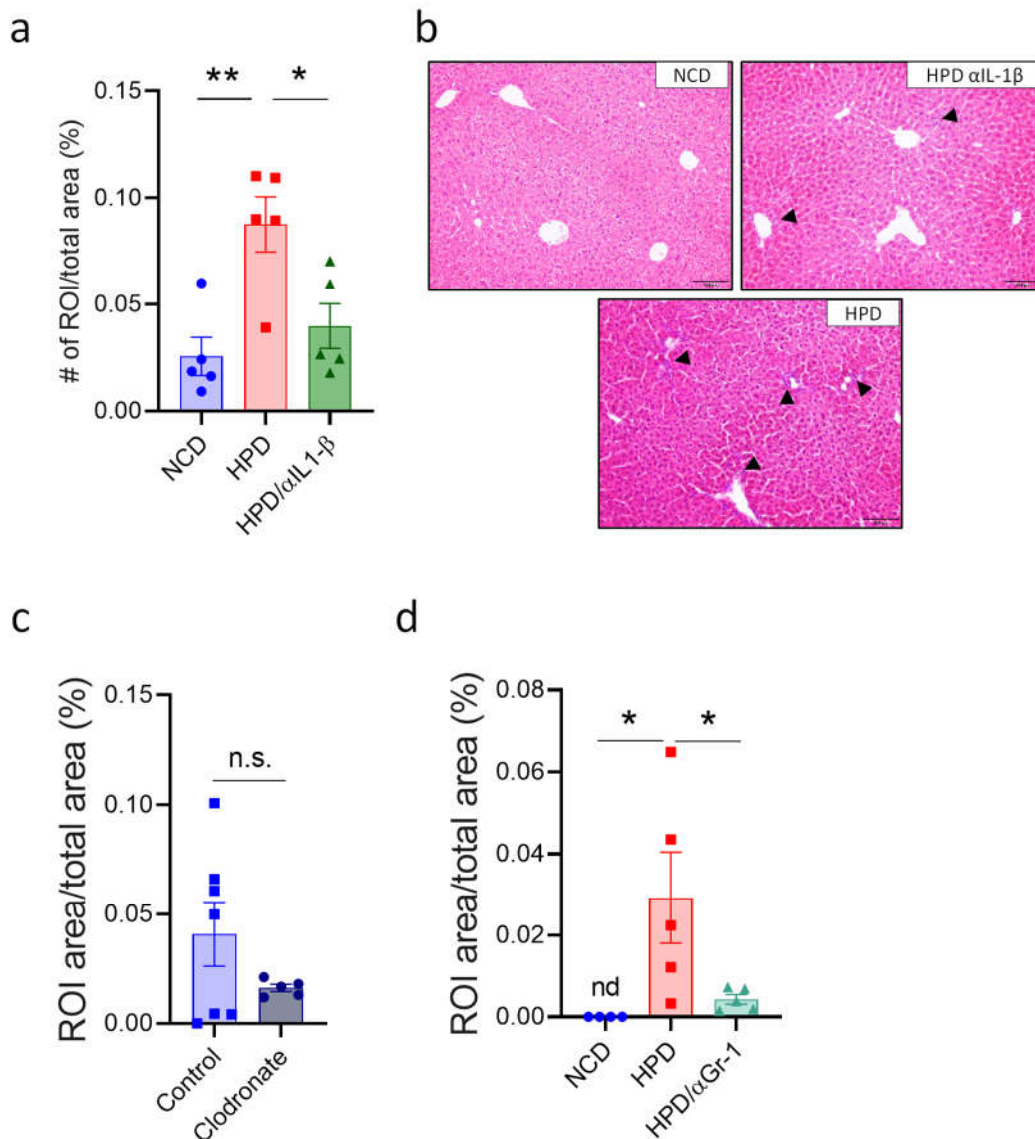

**Supplemental figure s3. HPD-induced liver pathology is mediated by neutrophilic granulocytes.** (a-b) Animals were fed for 2 weeks with an NCD or HPD and treated with PBS or anti-IL-1 $\beta$ . (a) Immune infiltration was calculated as a percentage of the total area of the section. (b) Representative liver slides stained with H&E. (c) WT mice were injected once every three days with empty (control) or clodronate-filled liposomes to deplete macrophages and feed a HPD an livers were analyzed by histology after two weeks. Immune infiltration was calculated as a percentage of the total area of the section (d) Animals were fed for 2 weeks with an NCD or HPD and treated with PBS or anti-GR-1. Immune infiltration was calculated as a percentage of the total area of the section. Data show means  $\pm$ s.e.m. For all panels, shown is one of at least two experiments with similar results. Indicated are statistical significances at Student's t-test; \*  $p < 0.05$ , \*\*  $p < 0.01$ , \*\*\*  $p < 0.001$ .

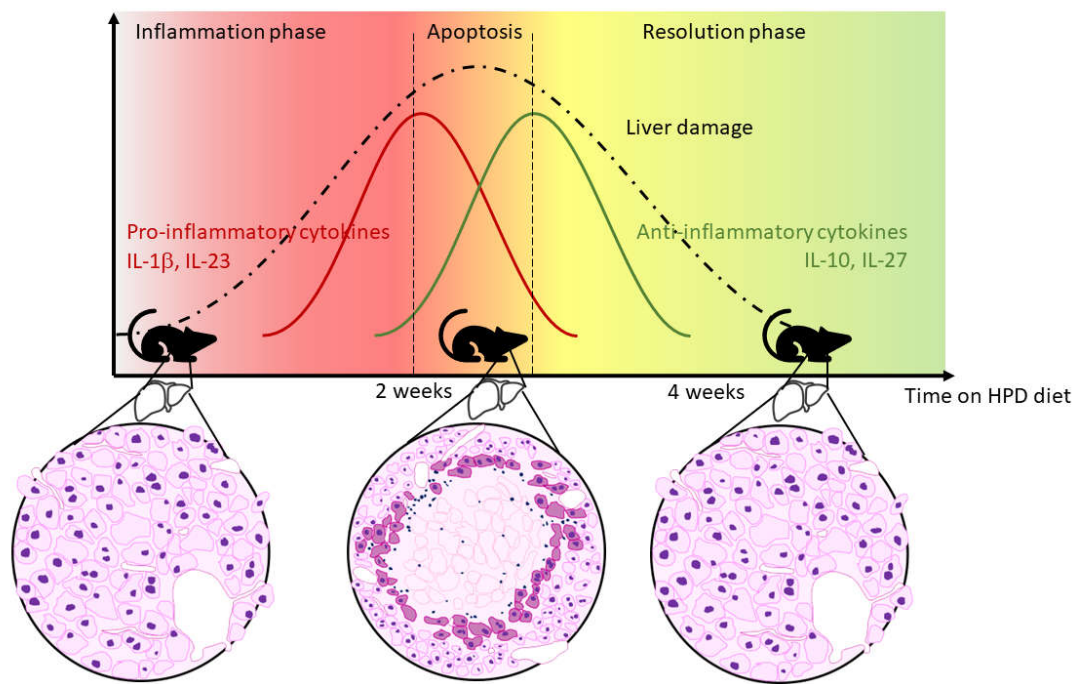

**Supplemental figure s4. Graphical representation of transient HPD-induced liver damage.**

**Supplementary Table s1; List of reagents and resources.**

| REAGENT or RESOURCE                                                | SOURCE            | IDENTIFIER        |
|--------------------------------------------------------------------|-------------------|-------------------|
| <b>Antibodies</b>                                                  |                   |                   |
| Anti-mouse IL-1 $\beta$ (clone B122)                               | BioXCell          | BE0246            |
| Anti-mouse Ly6G/Ly6C (Gr-1) (clone RB6-8C5)                        | BioXCell          | BP0075            |
| Armenian hamster anti-mouse CD11c monoclonal antibody (clone N418) | ebioscience       | 63-0114-82        |
| Mouse anti-mouse CD45.2 monoclonal antibody (clone 104)            | ebioscience       | 56-0454-82        |
| Rat anti-mouse CD11b monoclonal antibody (clone M1/70)             | ebioscience       | 25-0112-82        |
| Rat anti-mouse CD19 monoclonal antibody (clone eBio1D3)            | ebioscience       | 78-0193-82        |
| Rat anti-mouse F4/80 monoclonal antibody (clone BM8)               | ebioscience       | 17-4801-82        |
| Rat anti-mouse Ly6C monoclonal antibody (clone HK1.4)              | ebioscience       | 12-5932-82        |
| Rat anti-mouse Ly6G monoclonal antibody (clone 1A8-Ly6g)           | ebioscience       | 48-9668-82        |
| Rat anti-mouse MHC-II (I-A) monoclonal antibody (clone NIMR-4)     | ebioscience       | 11-5322-82        |
| Rat anti-mouse Siglec F monoclonal antibody (1RNM44N)              | ebioscience       | 46-1702-82        |
| <b>Chemicals, Peptides, and Recombinant Proteins</b>               |                   |                   |
| Casein                                                             | Myprotein THG     |                   |
| Cholesterol                                                        | Ssniff            | R143C010          |
| Clondronate and control liposomes                                  | Liposoma          | CP-005-005        |
| Diphtheria toxin                                                   | Merck             | 322326            |
| Entellan                                                           | Sigma Aldrich     | 1079600500        |
| Eosin                                                              | Fisher Scientific | 10061830          |
| Fixable Viability Dye eFluor 506                                   | ebioscience       | 65-0865-14        |
| Formaldehyde (4% NB)                                               | Biognost          | FNB4              |
| Fructose                                                           | Ssniff            | R111F040          |
| IC Fixation buffer                                                 | Invitrogen        | 00-8222           |
| Mayer's hematoxylin                                                | Sigma Aldrich     | MDL# MFCD00078111 |
| Percoll                                                            | Cytiva            | 17089101          |
| Permeabilization Buffer (10x)                                      | Invitrogen        | 00-8333           |
| Picric acid                                                        | Sigma Aldrich     | 319287            |
| Sirius Red (Direct Red 80)                                         | Sigma Aldrich     | 365548            |
| Standard mouse diet pellets                                        | Mucedola          | Diet 4RF21        |
| SuperBright Complete Staining Buffer                               | ebioscience       | SB-4401-75        |
| <b>Critical Comercial Assays</b>                                   |                   |                   |

|                                               |                                                                                         |                                                                                   |
|-----------------------------------------------|-----------------------------------------------------------------------------------------|-----------------------------------------------------------------------------------|
| Legendplex Mouse Inflammation Panel (13-plex) | BioLegend                                                                               | 740446                                                                            |
| <b>Software and Algorithms</b>                |                                                                                         |                                                                                   |
| Cell^ B Soft Imaging System                   | Olympus                                                                                 |                                                                                   |
| Fiji/ImageJ                                   | Open Source;<br><a href="https://doi.org/10.1038/nmeth.2019">doi:10.1038/nmeth.2019</a> | <a href="https://imagej.net/software/fiji/">https://imagej.net/software/fiji/</a> |
| FlowJo                                        | FlowJo LLC, BD Life Sciences                                                            |                                                                                   |
| GraphPad Prism                                | GraphPad Software                                                                       |                                                                                   |
| <b>Experimental Models: Organisms/Strains</b> |                                                                                         |                                                                                   |
| C57BL/6 (B6; line 664)                        | Jackson Laboratories                                                                    | JAX: 000664                                                                       |
| Lyz Cre                                       | Jackson Laboratories                                                                    | JAX: 0118956                                                                      |
| Rosa26 iDTR                                   | Prof. Ari Waisman; Mainz, Germany                                                       | JAX: 007900                                                                       |
